# Supplementary material for: A Waveform-Independent Measure of Recurrent Neural Activity
Source: Frontiers journal article supplement (doi:10.3389/fninf.2022.800116), 2022-03-07
Supplement: Data_Sheet_1.PDF [file Data_Sheet_1.PDF]

## Supplementary methods

### Ragwitz criterion

Assuming the process  $X$  to be Markovian i.e. stochastic with finite memory, the dimension  $d$  and the delay  $\tau$  can be reconstructed from univariate time series using Ragwitz criterion (Ragwitz and Kantz 2002). For a given combination of  $d$  and  $\tau$ , neighbours of every state  $\mathbf{x}_t$  within a spherical neighbourhood  $U_\epsilon$  of diameter  $\epsilon$  are iterated one time step. The mean of iterated neighbours is the prediction  $\hat{\mathbf{x}}_{t+1}$  of  $\mathbf{x}_{t+1}$ .

$$\hat{\mathbf{x}}_{t+1}^{d_x} = \frac{1}{|U_\epsilon(\mathbf{x}_t^{d_x})|} \sum_{\mathbf{x}_{t-\Delta t}^{d_x} \in U_\epsilon(\mathbf{x}_t^{d_x})} \mathbf{x}_{t-\Delta t+1}^{d_x} \quad (\text{S1})$$

Where  $t-\Delta t$  indicates that spatial neighbours temporally precede  $\mathbf{x}_t$  and  $|\cdot|$  indicates the number of neighbours in  $U_\epsilon$ . The combination of  $d$  and  $\tau$  is chosen for which the root mean squared prediction error is minimum:

$$RMSPE = \sqrt{\frac{\sum_{t=1}^n (\hat{\mathbf{x}}_{t+\Delta t}^{d_x} - \mathbf{x}_{t+\Delta t}^{d_x})^2}{n}} \quad (\text{S2})$$

where  $n$  is the number of states predicted.

### False nearest neighbours algorithm

For deterministic systems, the phase-space dimension may be alternatively reconstructed using the false nearest neighbourhood method (FNN, Hegger and Kantz 1999):

$$FNN(d) = \sum_i \theta \left( \frac{|x_{i+1} - n(x_i)_{j+1}|}{\|\mathbf{x}_i^d - \mathbf{n}_{xi}^d\|} - Rtol \right) \wedge \theta \left( \sqrt{(\|\mathbf{x}_i^d - \mathbf{n}_{xi}^d\|)^2 - (|x_{i+1} - n(x_i)_{j+1}|)^2} - SD(X) * Atol \right), \quad (\text{S3})$$

with  $\theta$  indicating the Heaviside-step function,  $i$  being the temporal index of  $x$ ,  $j$  representing the temporal index of  $n$ ,  $n(x_i)$  indicating the next neighbor of  $x_i$ ,  $\| \cdot \|$  indicating the maximum norm,  $R_{tol}$  being a distance threshold,  $A_{tol}$  being a loneliness threshold and  $SD$  indicating the standard deviation. If the embedding dimension is too low, false neighbours of points in phase-space may arise due to projections. The optimal embedding dimension is thus the dimension for which the percentage of false neighbours drops to zero.

#### Auto-mutual information

The embedding delay may be estimated using the auto-mutual information (AMI, Fraser and Swinney 1986). Here, the shared information between the present and past of a process  $X$  is calculated as a function of a delay  $\Delta t$ . The  $\Delta t$  for which AMI drops to zero may be used as  $\tau$  for the embedding:

$$AMI(X_t; X_{t-\Delta t}, \Delta t) = H(X_t) - H(X_t | X_{t-\Delta t}), \quad (S4)$$

with

$$H(X) = - \sum p(X = x) \log_2 p(X = x) \quad (S5)$$

and  $p(X=x)$  being the probability of  $X$  taking on the value of  $x$ .

#### Publication bibliography

Fraser; Swinney (1986): Independent coordinates for strange attractors from mutual information. In *Physical review. A, General physics* 33 (2), pp. 1134–1140. DOI: 10.1103/physreva.33.1134.

Hegger, R.; Kantz, H. (1999): Improved false nearest neighbor method to detect determinism in time series data. In *Physical review. E, Statistical physics, plasmas, fluids, and related interdisciplinary topics* 60 (4 Pt B), pp. 4970–4973. DOI: 10.1103/physreve.60.4970.

Ragwitz, M.; Kantz, H. (2002): Markov models from data by simple nonlinear time series predictors in delay embedding spaces. In *PHYSICAL REVIEW E* 6505 (5), p. 6201.
