# Supplementary material for: A Waveform-Independent Measure of Recurrent Neural Activity
Source: Frontiers journal article supplement (doi:10.3389/fninf.2022.800116), 2022-03-07
Supplement: Data_Sheet_2.PDF [file Data_Sheet_2.PDF]

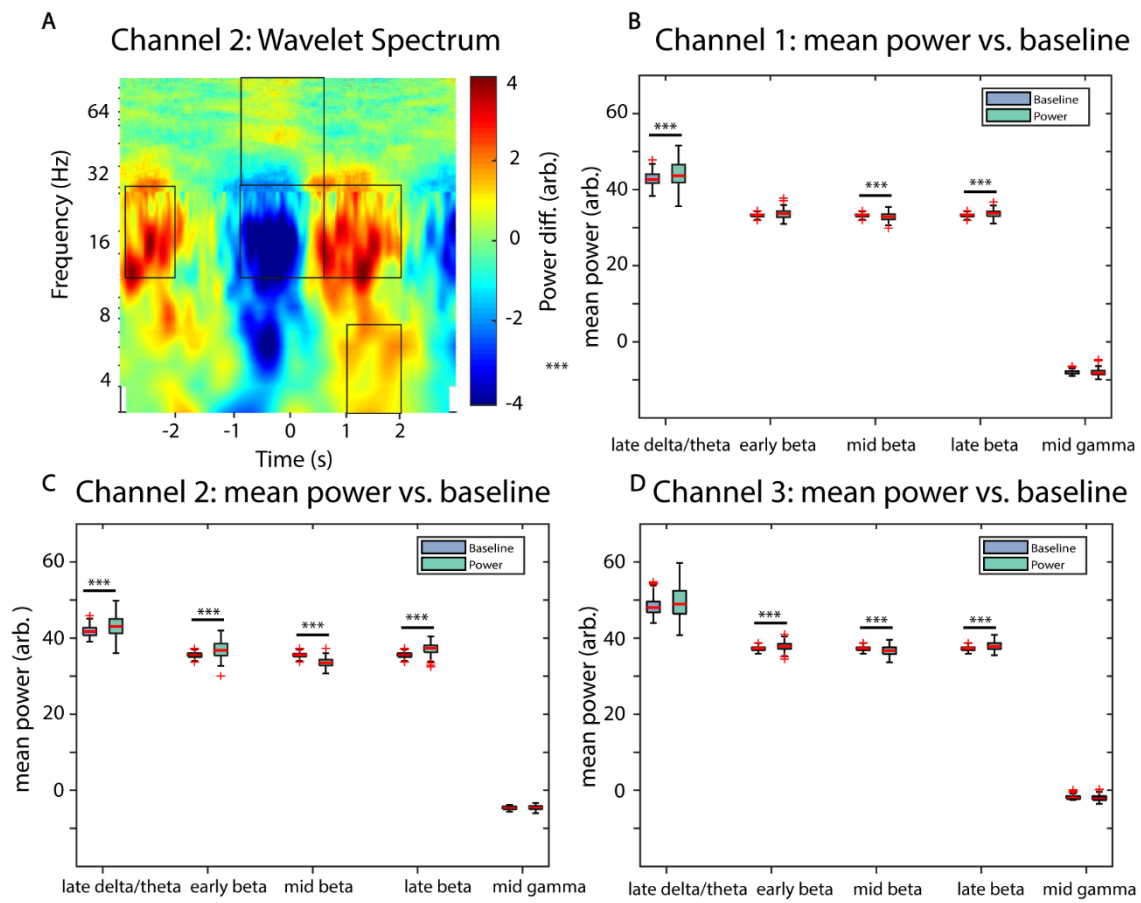

**Supplementary Figure S1: Statistical comparisons of combined multitaper-wavelet power with baseline activity.** A: Example multitaper-wavelet plot indicating the time-frequency intervals extracted for statistical analysis. B: Statistical comparisons for channel 1 (two-sided paired Student's t-test, Bonferroni corrected). C: Statistical comparisons for channel 2. D: Statistical comparisons for channel 3. Asterisks indicate significant differences (\*\*\*:  $p < 0.001$ ).
